# Supplementary material for: Development and Validation of a Prediction Model for Stroke, Cardiac, and Mortality Risk After Non‐Cardiac Surgery
Source: PubMed Central journal article supplement — J Am Heart Assoc. 2021 Jan 30;10(4):e018013. doi: 10.1161/JAHA.120.018013 (PMC7955339; doi:10.1161/jaha.120.018013), 2021-01-30
Supplement: JAH3-10-e018013-s001.pdf [file JAH3-10-e018013-s001.pdf]

# **SUPPLEMENTAL MATERIAL**

**Figure S1. Participant flow chart.**

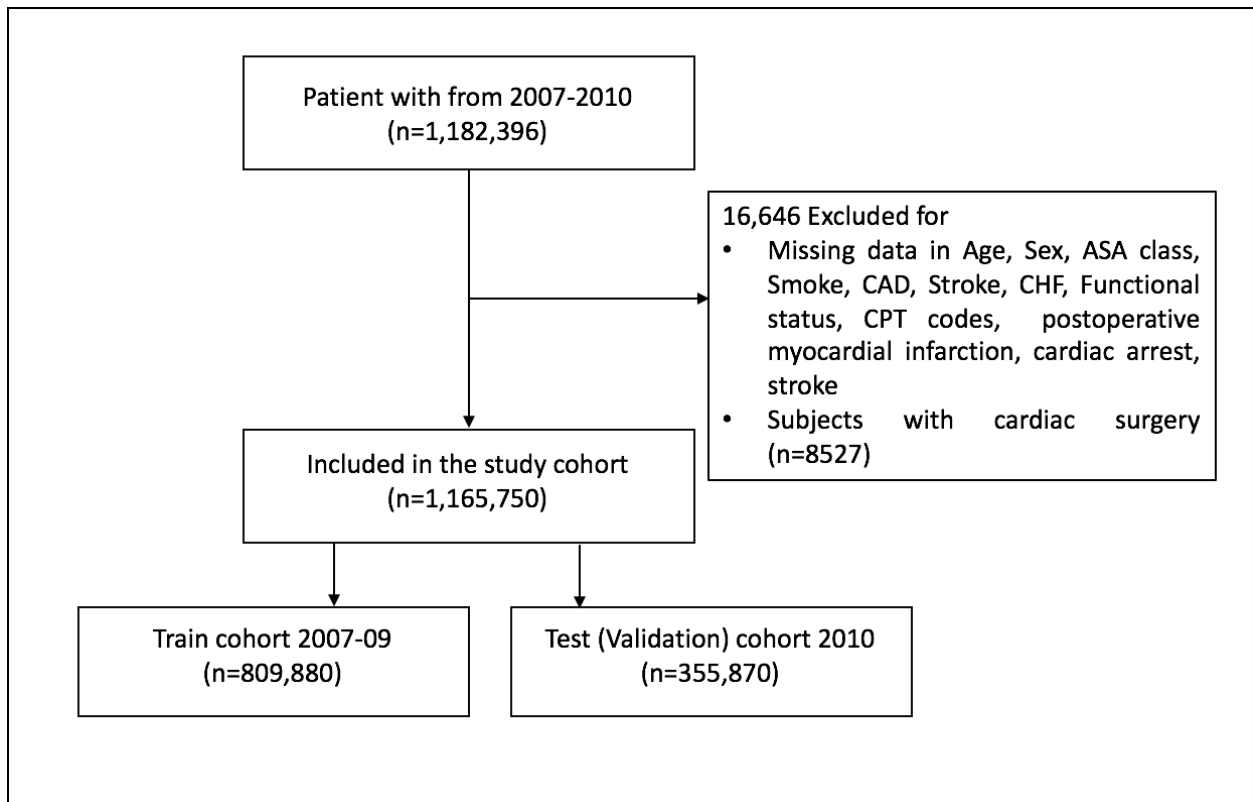

**Figure S2. Postoperative stroke according to serum sodium, creatinine and hematocrit. Stroke rate from 2007-2009 cohort.**

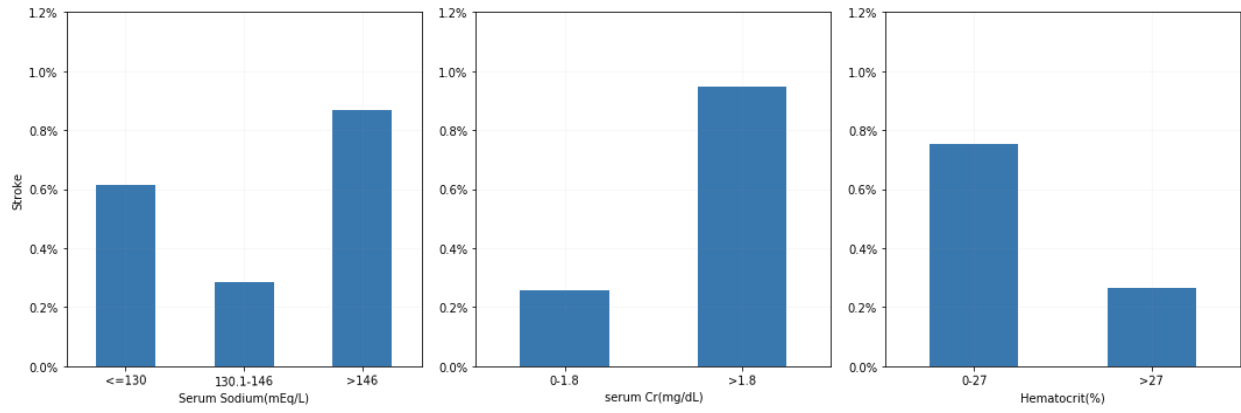

**Figure S3a. Calibration plot for postoperative stroke. Observed vs expected stroke risk.**

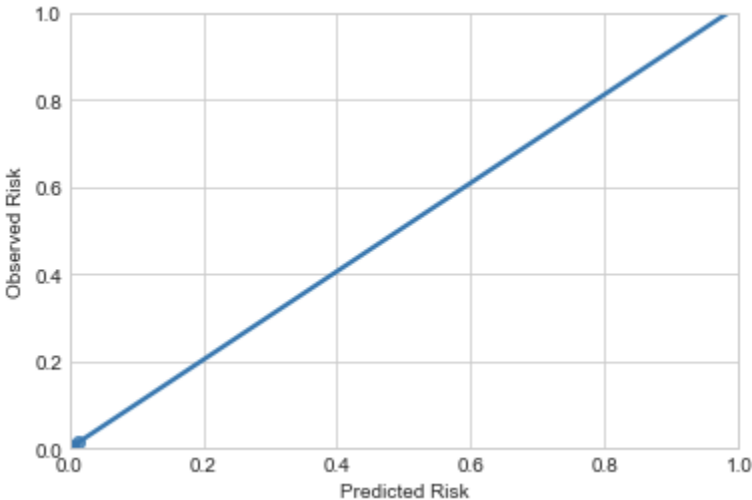

**Figure S3b. Calibration plot for postoperative major cardiovascular events(myocardial infarction, cardiac arrest, stroke). Observed vs expected risk.**

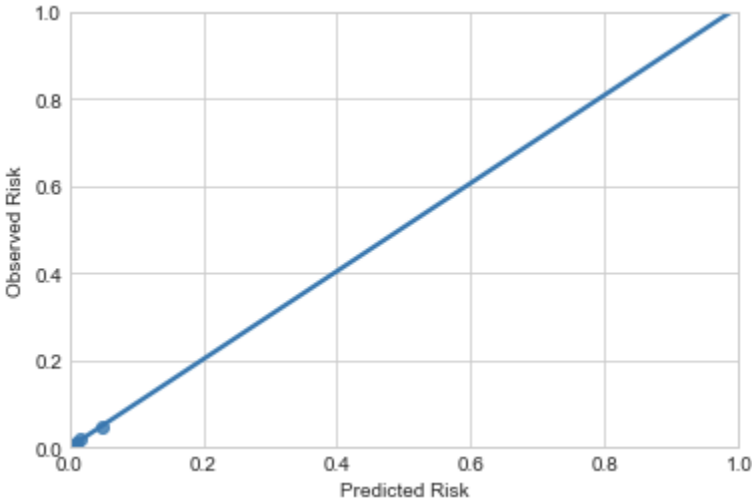

**Figure S3c. Calibration plot for 30-day postoperative death.**

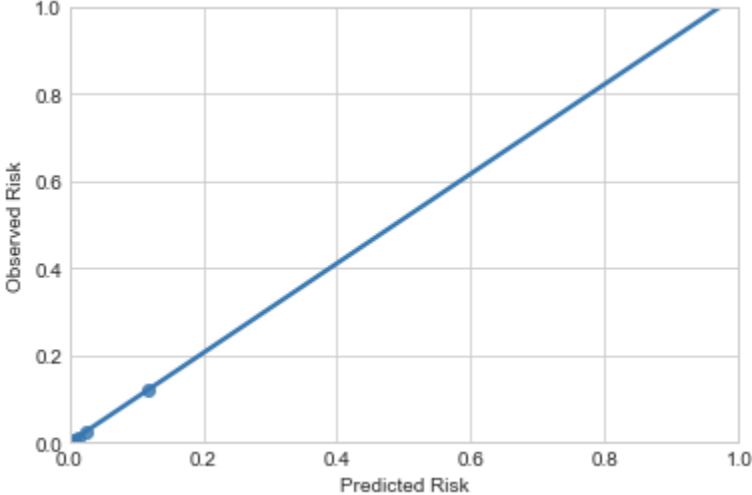

**Figure S4. Postoperative major cardiovascular events (MI, Cardiac Arrest or Stroke) according to serum sodium, creatinine and hematocrit. from 2007-2009 cohort**

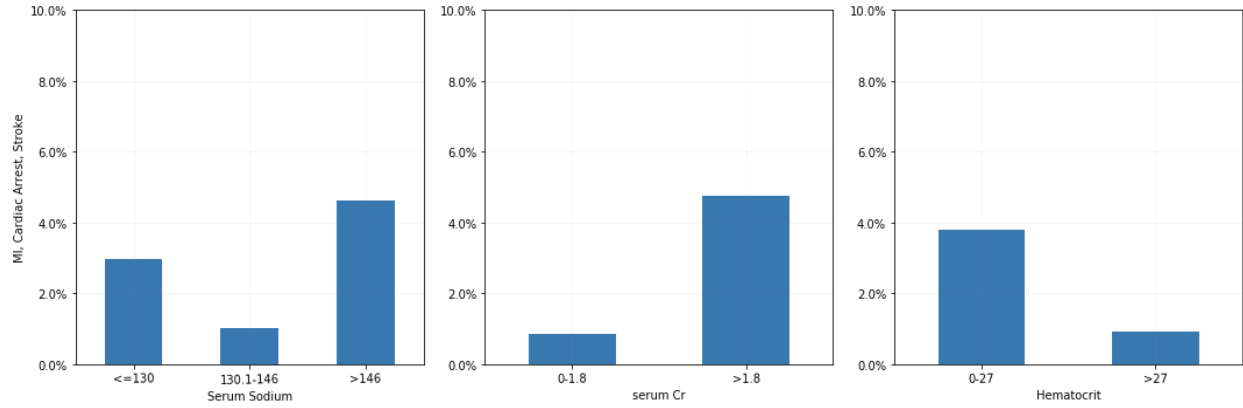

**Figure S5. The rates (%) of 30-day postoperative stroke and major cardiac complications in patients according to surgery types.**

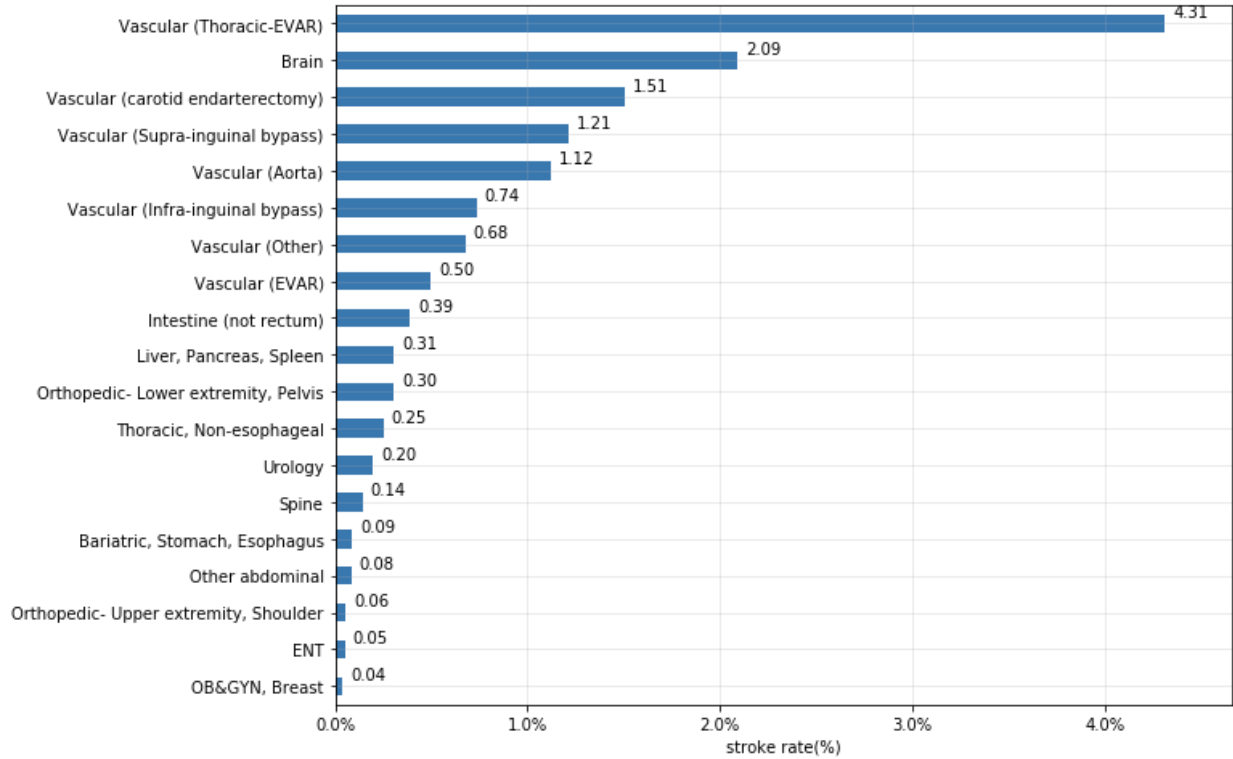

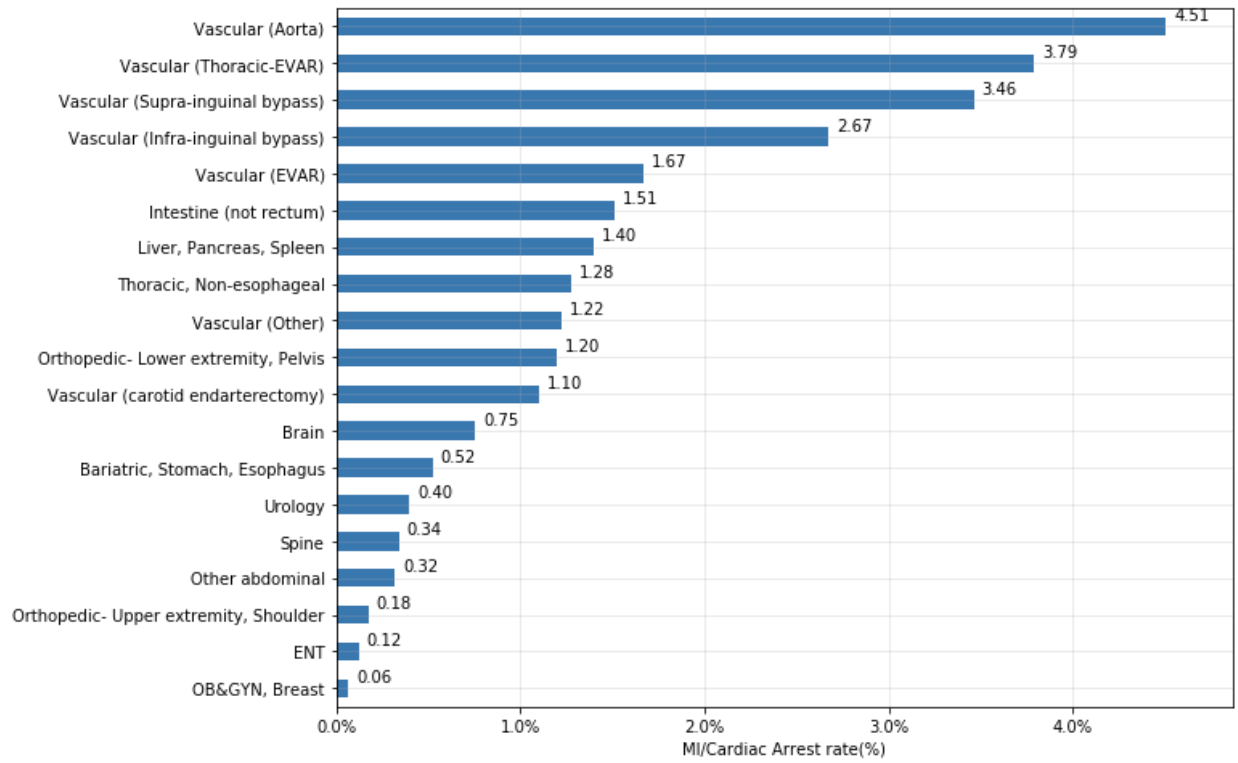



**Table S1. Adjusted odds ratio of predictors for 30-day postoperative stroke.**

|                                          | Adjusted odds ratio | Coefficient | SE    | P-value |
|------------------------------------------|---------------------|-------------|-------|---------|
| Intercept                                |                     | -10.382     | 0.366 | <0.001  |
| Age (per year)                           | 1.03 (1.02-1.03)    | 0.026       | 0.002 | <0.001  |
| Stroke                                   | 2.3 (2.08-2.55)     | 0.834       | 0.052 | <0.001  |
| Coronary artery disease                  | 1.02 (0.9-1.15)     | 0.021       | 0.062 | 0.732   |
| Emergency Surgery                        | 1.89 (1.68-2.12)    | 0.634       | 0.059 | <0.001  |
| Hematocrit 0-27% (ref: >27%)             | 1.29 (1.08-1.55)    | 0.255       | 0.093 | 0.006   |
| Hematocrit: missing                      | 0.93(0.69-1.26)     | -0.071      | 0.154 | 0.647   |
| Creatinine >1.8mg/dL (ref:≤1.8)          | 1.41 (1.24-1.6)     | 0.343       | 0.066 | <0.001  |
| Creatinine: missing                      | 0.84(0.58-1.23)     | -0.171      | 0.195 | 0.381   |
| Serum sodium ≤ 130mEq/L (ref: 130.1-146) | 1.04 (0.8-1.36)     | 0.042       | 0.136 | 0.755   |
| Serum sodium > 146mEq/L                  | 1.41 (0.99-2.01)    | 0.346       | 0.181 | 0.056   |
| Serum sodium: missing                    | 0.83(0.58-1.21)     | -0.181      | 0.189 | 0.338   |
| ASA class<br>(ref: ASA 1)                |                     |             |       |         |
| ASA 2 - mild disturbance                 | 3.48 (1.71-7.08)    | 1.248       | 0.362 | 0.001   |
| ASA 3- severe disturbance                | 8.51 (4.2-17.25)    | 2.142       | 0.360 | <0.001  |

|                                                |                     |        |       |        |
|------------------------------------------------|---------------------|--------|-------|--------|
| ASA 4- life threatening                        | 14.01 (6.88-28.56)  | 2.640  | 0.363 | <0.001 |
| ASA 5- moribund                                | 14.71 (6.77-31.93)  | 2.688  | 0.396 | <0.001 |
| Surgery type<br>(ref: other abdominal surgery) |                     |        |       |        |
| ENT                                            | 0.71 (0.45-1.13)    | -0.337 | 0.234 | 0.150  |
| bariatric, stomach, esophagus                  | 0.89 (0.67-1.18)    | -0.118 | 0.147 | 0.420  |
| brain                                          | 11.91 (8.88-15.96)  | 2.477  | 0.149 | <0.001 |
| intestine (not rectum)                         | 2.18 (1.85-2.57)    | 0.781  | 0.083 | <0.001 |
| liver, pancreas, spleen                        | 2.41 (1.82-3.19)    | 0.879  | 0.143 | <0.001 |
| obstetrics, gynecology, breast                 | 0.65 (0.47-0.9)     | -0.434 | 0.168 | 0.010  |
| orthopedic (lower extremity, pelvis)           | 1.63 (1.3-2.04)     | 0.488  | 0.115 | <0.001 |
| orthopedic (upper extremity, shoulder)         | 0.3 (0.08-1.22)     | -1.191 | 0.710 | 0.094  |
| spine                                          | 1.82 (1.15-2.88)    | 0.599  | 0.234 | 0.010  |
| thoracic (non-esophageal)                      | 1.83 (1.21-2.75)    | 0.602  | 0.208 | 0.004  |
| urology                                        | 1.51 (1.03-2.22)    | 0.414  | 0.195 | 0.034  |
| vascular (carotid endarterectomy)              | 5.19 (4.36-6.17)    | 1.647  | 0.089 | <0.001 |
| vascular (aorta)                               | 3.08 (2.33-4.06)    | 1.124  | 0.141 | <0.001 |
| vascular (thoracic EVAR)                       | 15.11 (10.98-20.79) | 2.715  | 0.163 | <0.001 |
| vascular (EVAR)                                | 2.17 (1.59-2.96)    | 0.773  | 0.159 | <0.001 |

|                           |                   |        |       |        |
|---------------------------|-------------------|--------|-------|--------|
| vascular (supra-inguinal) | 5.32 (0.72-39.24) | 1.671  | 1.020 | 0.101  |
| vascular (infra-inguinal) | 3.21 (2.59-3.98)  | 1.167  | 0.109 | <0.001 |
| vascular (other)          | 3.03 (2.48-3.71)  | 1.109  | 0.103 | <0.001 |
| other surgery             | 0.97 (0.66-1.41)  | -0.035 | 0.194 | 0.856  |

SE- standard error, CI- confidence interval, EVAR- endovascular aneurysm repair

**Table S2. Adjusted odds ratio of predictors for 30-day postoperative major cardiovascular complications (myocardial infarction, cardiac arrest, and/or stroke).**

|                                             | Adjusted odds ratio<br>(95% CI) | Coefficient | SE    | P-value |
|---------------------------------------------|---------------------------------|-------------|-------|---------|
| intercept                                   |                                 | -9.368      | 0.224 | <0.001  |
| Age (per year)                              | 1.03 (1.03-1.03)                | 0.027       | 0.001 | <0.001  |
| Stroke                                      | 1.46 (1.37-1.55)                | 0.377       | 0.031 | <0.001  |
| Coronary artery disease                     | 1.43 (1.34-1.52)                | 0.356       | 0.031 | <0.001  |
| Emergency Surgery                           | 1.88 (1.77-1.99)                | 0.630       | 0.031 | <0.001  |
| Hematocrit 0-27% (ref: >27%)                | 1.42 (1.31-1.55)                | 0.353       | 0.044 | <0.001  |
| Hematocrit: missing                         | 0.91 (0.77-1.08)                | -0.097      | 0.087 | 0.268   |
| Creatinine >1.8mg/dL                        | 1.96 (1.84-2.09)                | 0.673       | 0.032 | <0.001  |
| Creatinine: missing                         | 0.78 (0.63-0.97)                | -0.249      | 0.112 | 0.026   |
| Serum sodium ≤ 130mEq/L<br>(ref: 130.1-146) | 1.2 (1.06-1.36)                 | 0.184       | 0.064 | 0.004   |
| Serum sodium > 146mEq/L                     | 1.67 (1.42-1.97)                | 0.515       | 0.084 | <0.001  |
| Serum sodium: missing                       | 0.88 (0.72-1.09)                | -0.123      | 0.107 | 0.252   |
| ASA class (ref: ASA 1)                      |                                 |             |       |         |
| ASA 2 - mild disturbance                    | 3.71 (2.4-5.75)                 | 1.312       | 0.223 | <0.001  |
| ASA 3- severe disturbance                   | 12.01 (7.78-18.54)              | 2.486       | 0.221 | <0.001  |

|                                        |                     |        |       |        |
|----------------------------------------|---------------------|--------|-------|--------|
| ASA 4- life threatening                | 25.26 (16.33-39.08) | 3.229  | 0.223 | <0.001 |
| ASA 5- moribund                        | 41.62 (26.45-65.51) | 3.729  | 0.231 | <0.001 |
| Surgery type                           |                     |        |       |        |
| ENT (ref: other abdominal surgery)     | 0.56 (0.43-0.72)    | -0.582 | 0.131 | <0.001 |
| bariatric, stomach, esophagus          | 1.3 (1.15-1.47)     | 0.264  | 0.061 | <0.001 |
| brain                                  | 3.74 (2.95-4.74)    | 1.320  | 0.121 | <0.001 |
| intestine (not rectum)                 | 2.08 (1.92-2.25)    | 0.733  | 0.040 | <0.001 |
| liver, pancreas, spleen                | 2.73 (2.4-3.1)      | 1.003  | 0.066 | <0.001 |
| obstetrics, gynecology, breast         | 0.36 (0.29-0.45)    | -1.008 | 0.111 | <0.001 |
| orthopedic (lower extremity, pelvis)   | 1.68 (1.51-1.87)    | 0.520  | 0.054 | <0.001 |
| orthopedic (upper extremity, shoulder) | 0.39 (0.22-0.72)    | -0.931 | 0.304 | 0.002  |
| spine                                  | 1.42 (1.1-1.84)     | 0.354  | 0.130 | 0.006  |
| thoracic (non-esophageal)              | 2 (1.66-2.41)       | 0.694  | 0.094 | <0.001 |
| urology                                | 1.01 (0.81-1.26)    | 0.008  | 0.112 | 0.944  |
| vascular (carotid endarterectomy)      | 2.13 (1.92-2.37)    | 0.758  | 0.053 | <0.001 |
| vascular (aorta)                       | 3.02 (2.65-3.43)    | 1.104  | 0.066 | <0.001 |
| vascular (thoracic EVAR)               | 5.27 (4.16-6.67)    | 1.662  | 0.120 | <0.001 |
| vascular (EVAR)                        | 1.61 (1.37-1.89)    | 0.476  | 0.083 | <0.001 |

|                           |                  |       |       |        |
|---------------------------|------------------|-------|-------|--------|
| vascular (supra-inguinal) | 2.15 (0.51-9.06) | 0.766 | 0.734 | 0.297  |
| vascular (infra-inguinal) | 2.93 (2.63-3.25) | 1.074 | 0.054 | <0.001 |
| vascular (other)          | 1.58 (1.41-1.77) | 0.459 | 0.058 | <0.001 |
| other surgery             | 1.01 (0.85-1.21) | 0.013 | 0.091 | 0.890  |

**Table S3. Adjusted odds ratio of predictors for postoperative Myocardial Infarction or Cardiac Arrest.**

|                                          | adjusted odds ratio | coefficient | SE    | P-value |
|------------------------------------------|---------------------|-------------|-------|---------|
| Intercept                                |                     | -9.828      | 0.283 | <0.001  |
| Age (per year)                           | 1.03 (1.03-1.03)    | 0.027       | 0.001 | <0.001  |
| Stroke                                   | 1.19 (1.1-1.28)     | 0.170       | 0.037 | <0.001  |
| Coronary artery disease                  | 1.58 (1.48-1.69)    | 0.458       | 0.035 | <0.001  |
| Emergency Surgery                        | 1.85 (1.73-1.98)    | 0.615       | 0.035 | <0.001  |
| Hematocrit 0-27% (ref: >27%)             | 1.43 (1.3-1.57)     | 0.355       | 0.048 | <0.001  |
| Hematocrit: missing                      | 0.93 (0.76-1.13)    | -0.075      | 0.102 | 0.462   |
| Serum creatinine >1.8mg/dL (ref:≤1.8)    | 2.13 (1.99-2.29)    | 0.758       | 0.036 | <0.001  |
| Serum creatinine: missing                | 0.74 (0.57-0.96)    | -0.297      | 0.133 | 0.025   |
| Serum sodium ≤ 130mEq/L (ref: 130.1-146) | 1.23 (1.07-1.41)    | 0.205       | 0.071 | 0.004   |
| Serum sodium > 146mEq/L                  | 1.69 (1.41-2.02)    | 0.525       | 0.092 | <0.001  |
| Serum sodium: missing                    | 0.95 (0.74-1.22)    | -0.048      | 0.126 | 0.702   |
| ASA class (ref: ASA 1)                   |                     |             |       |         |
| ASA 2 - mild disturbance                 | 4.02 (2.31-7)       | 1.391       | 0.283 | <0.001  |
| ASA 3- severe disturbance                | 14.55 (8.39-25.22)  | 2.678       | 0.281 | <0.001  |

|                                                |                     |        |       |        |
|------------------------------------------------|---------------------|--------|-------|--------|
| ASA 4- life threatening                        | 33.26 (19.14-57.79) | 3.505  | 0.282 | <0.001 |
| ASA 5- moribund                                | 58.15 (32.96-102.6) | 4.063  | 0.290 | <0.001 |
| Surgery type<br>(ref: other abdominal surgery) |                     |        |       |        |
| ENT                                            | 0.49 (0.36-0.68)    | -0.704 | 0.159 | <0.001 |
| bariatric, stomach, esophagus                  | 1.42 (1.25-1.62)    | 0.352  | 0.067 | <0.001 |
| brain                                          | 1.18 (0.76-1.83)    | 0.164  | 0.224 | 0.466  |
| intestine (not rectum)                         | 2.04 (1.87-2.23)    | 0.714  | 0.045 | <0.001 |
| liver, pancreas, spleen                        | 2.82 (2.44-3.25)    | 1.036  | 0.073 | <0.001 |
| obstetrics, gynecology, breast                 | 0.27 (0.2-0.36)     | -1.312 | 0.146 | <0.001 |
| orthopedic (lower extremity, pelvis)           | 1.68 (1.49-1.89)    | 0.520  | 0.060 | <0.001 |
| orthopedic (upper extremity,<br>shoulder)      | 0.41 (0.21-0.8)     | -0.884 | 0.336 | 0.009  |
| spine                                          | 1.3 (0.96-1.75)     | 0.259  | 0.154 | 0.094  |
| thoracic (non-esophageal)                      | 2.02 (1.65-2.48)    | 0.705  | 0.104 | <0.001 |
| urology                                        | 0.84 (0.64-1.1)     | -0.175 | 0.137 | 0.202  |
| vascular (carotid endarterectomy)              | 1.16 (1.01-1.34)    | 0.152  | 0.073 | 0.037  |
| vascular (aorta)                               | 2.95 (2.56-3.4)     | 1.082  | 0.073 | <0.001 |
| vascular (thoracic EVAR)                       | 2.64 (1.89-3.68)    | 0.969  | 0.171 | <0.001 |



|                           |                  |       |       |        |
|---------------------------|------------------|-------|-------|--------|
| vascular (EVAR)           | 1.47 (1.22-1.77) | 0.387 | 0.095 | <0.001 |
| vascular (supra-inguinal) | 1.29 (0.17-9.53) | 0.255 | 1.020 | 0.803  |
| vascular (infra-inguinal) | 2.83 (2.52-3.19) | 1.041 | 0.060 | <0.001 |
| vascular (other)          | 1.23 (1.08-1.41) | 0.209 | 0.070 | 0.003  |
| other surgery             | 1.02 (0.84-1.24) | 0.020 | 0.101 | 0.846  |

**Table S4. Adjusted odds ratio of predictors for postoperative Myocardial Infarction.**

|                                             | Adjusted odds ratio | Coefficient | SE    | P value |
|---------------------------------------------|---------------------|-------------|-------|---------|
| Intercept                                   | 0 (0-0)             | -11.330     | 0.457 | <0.001  |
| Age (per year)                              | 1.04 (1.04-1.04)    | 0.040       | 0.002 | <0.001  |
| Stroke                                      | 1.23 (1.1-1.36)     | 0.204       | 0.054 | <0.001  |
| Coronary artery disease                     | 2.03 (1.84-2.23)    | 0.708       | 0.049 | <0.001  |
| Emergency Surgery                           | 1.74 (1.57-1.94)    | 0.557       | 0.054 | <0.001  |
| Hematocrit 0-27% (ref: >27%)                | 1.19 (1.01-1.4)     | 0.171       | 0.084 | 0.041   |
| Hematocrit: missing                         | 0.81 (0.60-1.1)     | -0.213      | 0.156 | 0.172   |
| Serum creatinine >1.8mg/dL<br>(ref:≤1.8)    | 1.66 (1.48-1.86)    | 0.506       | 0.058 | <0.001  |
| Serum creatinine: missing                   | 0.87 (0.60-1.26)    | -0.142      | 0.189 | 0.452   |
| Serum sodium ≤ 130mEq/L<br>(ref: 130.1-146) | 1.09 (0.86-1.38)    | 0.087       | 0.119 | 0.464   |
| Serum sodium > 146mEq/L                     | 1.14 (0.81-1.61)    | 0.132       | 0.175 | 0.452   |
| Serum sodium: missing                       | 0.91 (0.64-1.3)     | -0.095      | 0.181 | 0.599   |
| ASA class<br>(ref: ASA 1)                   |                     |             |       |         |
| ASA 2 - mild disturbance                    | 4.19 (1.72-10.21)   | 1.433       | 0.454 | 0.002   |
| ASA 3- severe disturbance                   | 12.01 (4.95-29.12)  | 2.486       | 0.452 | <0.001  |

|                                                |                    |        |       |        |
|------------------------------------------------|--------------------|--------|-------|--------|
| ASA 4- life threatening                        | 20.32 (8.35-49.45) | 3.012  | 0.454 | <0.001 |
| ASA 5- moribund                                | 22.22 (8.79-56.17) | 3.101  | 0.473 | <0.001 |
| Surgery type<br>(ref: other abdominal surgery) |                    |        |       |        |
| ENT                                            | 0.39 (0.23-0.67)   | -0.940 | 0.274 | 0.001  |
| bariatric, stomach, esophagus                  | 1.39 (1.12-1.72)   | 0.328  | 0.109 | 0.003  |
| brain                                          | 1.1 (0.52-2.33)    | 0.095  | 0.384 | 0.806  |
| intestine (not rectum)                         | 2.1 (1.83-2.42)    | 0.743  | 0.071 | <0.001 |
| liver, pancreas, spleen                        | 2.36 (1.86-3)      | 0.859  | 0.122 | <0.001 |
| obstetrics, gynecology, breast                 | 0.31 (0.21-0.47)   | -1.165 | 0.205 | <0.001 |
| orthopedic (lower extremity, pelvis)           | 1.85 (1.55-2.22)   | 0.616  | 0.092 | <0.001 |
| orthopedic (upper extremity,<br>shoulder)      | 0.21 (0.05-0.86)   | -1.539 | 0.710 | 0.030  |
| spine                                          | 1.59 (1.05-2.41)   | 0.464  | 0.212 | 0.029  |
| thoracic (non-esophageal)                      | 1.64 (1.15-2.33)   | 0.495  | 0.179 | 0.006  |
| urology                                        | 1.2 (0.85-1.69)    | 0.183  | 0.175 | 0.294  |
| vascular (carotid endarterectomy)              | 1.64 (1.36-1.99)   | 0.497  | 0.098 | <0.001 |
| vascular (aorta)                               | 3.46 (2.79-4.29)   | 1.242  | 0.109 | <0.001 |
| vascular (thoracic EVAR)                       | 2.11 (1.18-3.79)   | 0.748  | 0.298 | 0.012  |

|                           |                   |        |       |        |
|---------------------------|-------------------|--------|-------|--------|
| vascular (EVAR)           | 2.25 (1.77-2.86)  | 0.810  | 0.123 | <0.001 |
| vascular (supra-inguinal) | 4.02 (0.55-29.59) | 1.392  | 1.018 | 0.171  |
| vascular (infra-inguinal) | 4.13 (3.5-4.87)   | 1.417  | 0.084 | <0.001 |
| vascular (other)          | 1.28 (1.02-1.59)  | 0.243  | 0.112 | 0.030  |
| other surgery             | 0.75 (0.52-1.08)  | -0.285 | 0.186 | 0.125  |

**Table S5. Adjusted odds ratio of predictors for 30-day mortality.**

|                                             | Adjusted odds ratio | Coefficient | SE    | P-value |
|---------------------------------------------|---------------------|-------------|-------|---------|
| Intercept                                   |                     | -9.700      | 0.204 | <0.001  |
| Age (per year)                              | 1.04 (1.04-1.04)    | 0.039       | 0.001 | <0.001  |
| Stroke                                      | 1.18 (1.12-1.24)    | 0.165       | 0.026 | <0.001  |
| Coronary artery disease                     | 1.01 (0.96-1.07)    | 0.013       | 0.026 | 0.632   |
| Emergency Surgery                           | 2.77 (2.66-2.89)    | 1.019       | 0.022 | <0.001  |
| Hematocrit 0-27% (ref: >27%)                | 1.78 (1.68-1.89)    | 0.578       | 0.030 | <0.001  |
| Hematocrit: missing                         | 0.75 (0.64-0.88)    | -0.288      | 0.08  | <0.001  |
| Serum creatinine >1.8mg/dL                  | 2.14 (2.04-2.24)    | 0.759       | 0.024 | <0.001  |
| Serum creatinine: missing                   | 0.77 (0.63-0.93)    | -0.265      | 0.100 | 0.008   |
| Serum sodium ≤ 130mEq/L<br>(ref: 130.1-146) | 1.62 (1.49-1.76)    | 0.481       | 0.043 | <0.001  |
| Serum sodium > 146mEq/L                     | 2.25 (2-2.53)       | 0.811       | 0.059 | <0.001  |
| Serum sodium: missing                       | 0.82 (0.68-1.00)    | -0.194      | 0.097 | 0.047   |
| ASA class (ref: ASA 1)                      |                     |             |       |         |
| ASA 2 - mild disturbance                    | 2.74 (1.83-4.1)     | 1.008       | 0.205 | <0.001  |
| ASA 3- severe disturbance                   | 15.01 (10.1-22.31)  | 2.709       | 0.202 | <0.001  |

|                                                |                        |        |       |        |
|------------------------------------------------|------------------------|--------|-------|--------|
| ASA 4- life threatening                        | 59.93 (40.29-89.13)    | 4.093  | 0.203 | <0.001 |
| ASA 5- moribund                                | 261.22 (174.15-391.83) | 5.565  | 0.207 | <0.001 |
| Surgery type<br>(ref: other abdominal surgery) |                        |        |       |        |
| ENT                                            | 0.29 (0.22-0.38)       | -1.231 | 0.135 | <0.001 |
| bariatric, stomach, esophagus                  | 1.14 (1.05-1.24)       | 0.132  | 0.044 | 0.003  |
| brain                                          | 1.99 (1.62-2.43)       | 0.687  | 0.103 | <0.001 |
| intestine (not rectum)                         | 1.76 (1.67-1.86)       | 0.567  | 0.028 | <0.001 |
| liver, pancreas, spleen                        | 1.8 (1.62-2)           | 0.588  | 0.053 | <0.001 |
| obstetrics, gynecology, breast                 | 0.23 (0.19-0.28)       | -1.466 | 0.104 | <0.001 |
| orthopedic (lower extremity, pelvis)           | 1.13 (1.04-1.22)       | 0.120  | 0.040 | 0.002  |
| orthopedic (upper extremity, shoulder)         | 0.41 (0.27-0.6)        | -0.904 | 0.202 | <0.001 |
| spine                                          | 0.72 (0.56-0.93)       | -0.324 | 0.128 | 0.012  |
| thoracic (non-esophageal)                      | 2.03 (1.8-2.3)         | 0.709  | 0.063 | <0.001 |
| urology                                        | 0.41 (0.33-0.52)       | -0.890 | 0.115 | <0.001 |
| vascular (carotid endarterectomy)              | 0.46 (0.41-0.51)       | -0.784 | 0.060 | <0.001 |
| vascular (aorta)                               | 1.45 (1.31-1.61)       | 0.372  | 0.053 | <0.001 |
| vascular (thoracic EVAR)                       | 1.14 (0.88-1.49)       | 0.135  | 0.133 | 0.313  |
| vascular (EVAR)                                | 0.63 (0.54-0.73)       | -0.465 | 0.074 | <0.001 |

|                           |                  |        |       |        |
|---------------------------|------------------|--------|-------|--------|
| vascular (supra-inguinal) | 0.68 (0.19-2.45) | -0.386 | 0.654 | 0.555  |
| vascular (infra-inguinal) | 1 (0.91-1.1)     | 0.002  | 0.049 | 0.962  |
| vascular (other)          | 0.82 (0.76-0.9)  | -0.193 | 0.045 | <0.001 |
| other surgery             | 0.85 (0.74-0.96) | -0.168 | 0.065 | 0.009  |
